# Supplementary material for: Gene Expression Profiles Identify Inflammatory Signatures in Dendritic Cells
Source: PLoS One. 2010 Feb 24;5(2):e9404. doi: 10.1371/journal.pone.0009404 (PMC2827557; doi:10.1371/journal.pone.0009404)
Supplement: Figure S4 — Primer sequences of house keeping and 54 genes used. (0.03 MB XLS) [file pone.0009404.s004.xls]

## Sheet: primers
Gene symbol	NCBI Reference Sequence	Primer Name	Primer Sequence 5'-3'
18s	NR_003278	m18s_F1	CGAAAGCATTTGCCAAGAAT
		m18s_R1	AGTCGGCATCGTTTATGGTC
Txndc16	NM_172597	5730420B22Rik_F	CCAGGAATGGAAACCTCCTC
		5730420B22Rik_R	CACCTCTGCTTCTTTCTGACACTCTA
ANXA4	NM_013471	ANXA4_F	GGGCTGTCTGATTGAGATCC
		ANXA4_R	TATTGCTGCTGGTATGTCTGG
CCL22	NM_009137	CCL22_F	TCTCGTCCTTCTTGCTGTGG
		CCL22_R	CACTAAACGTGATGGCAGAGG
CCNB2	NM_007630	CCNB2_F	CAACAAGCAGCCGAAACC
		CCNB2_R	GAGCAGAGCATCAGAGAAAGC
CCR7	NM_007719	CCR7_F	GGCTCTCCTTGTCATTTTCC
		CCR7_R	CCTTAAAGTTCCGCACATCC
CD40	NM_011611, NM_170701,	CD40_F	GGTCCATCTAGGGCAGTGTG
	NM_170702, NM_170703, NM_170704	CD40_R	GGTCCATCTAGGGCAGTGTG
CD83	NM_009856	CD83_F	GTGGCACTGAGAGTGTGGAG
		CD83_R	TTGGATCGTCAGGGAATAGG
CD86	NM_019388	CD86_F	ATCAAGGACATGGGCTCGTA
		CD86_R	GAAGTTGGCGATCACTGACA
CDC20	NM_023223	CDC20_F2	GCACTCACTGCTTCAACTGG
		CDC20_R2	TGGCTTCCTTTGCTTTGC
Cdkn1a	NM_007669	Cdkn1a_F	CTTGTCGCTGTCTTGCACTC
		Cdkn1a_R	AATCTGTCAGGCTGGTCTGC
Clic4	NM_013885	Clic4_F	TGATGGTGAAAGCATTGGAA
		Clic4_R	TGCAGGTTTCCTTTTCAGGT
DAXX	NM_007829	DAXX_F	GGCGAGAGACAGAAGAGACG
		DAXX_R	CTAGGACCCTCACCAGATTCC
DNAJB6	NM_011847,NM_001037941	DNAJB6_F	ACGACAAATATGGCAAAGAAGG
		DNAJB6_R	TGAAGACATCATCTGGGTTCC
Daglb	NM_144915	E330036I19RIK_F	GCTACTGTTCCAGCGACTCC
		E330036I19RIK_R	CTGAACCACCCTCCTCTTCC
Eif4ebp2	NM_010124	Eif4ebp2 _F	GACGCTGTTCTCCACAACG
		Eif4ebp2_R	GGTGACTCCAGGGATATTGG
Elovl6	NM_130450	Elovl6_F	GGTGACTCCAGGGATATTGG
		Elovl6_R	GTGGGAGTAGCACTGGTCGT
Gadd45b	NM_008655	Gadd45b_F	CTCCTGGTCACGAACTGTCA
		Gadd45b_R	CCCATTGGTTATTGCCTCTG
GNAI3	NM_010306	GNAI3_F2	TGAGGACGGCTATTCAGAGG
		GNAI3_R2	CCCCAAAATCAATCTTCAACC
H2-DMa	NM_010386	H2-Dma_F	CTGCCTTCGGATCTCCTAGA
		H2-Dma_R	GTCACCTGAGCACGGTCTCT
Hdac5	NM_001077696	Hdac5_F	CGTGGACTGGGATATTCACC
		Hdac5_R	GAAAGAAGTTCCCGTTGTCG
Icam1	NM_010493	Icam1_F3	GCCTTGGTAGAGGTGACTGAG
		Icam1_R3	GACCGGAGCTGAAAAGTTGTA
IFIT1	NM_008331	IFIT1_F	CAGCACATCTTGCCAAAGC
		IFIT1_R	TAGCCAGAGGAAGGTGATGC
IL12b	NM_008352	IL12b_F	CCTGGACCTCAGACCAGAGA
		IL12b_R	AGAGTCTCGCCTCCTTTGTG
Il18r1	NM_008365	IL18r1_F	TTCAAAGGCAGTGCTTCACA
		IL18r1_R	GTACGTTCCCTCATCCTCCA
IL-1b	NM_008361	IL-1b_F	AGCTTCAAATCTCGCAGCAG
		IL-1b_R	TGTCCTCATCCTGGAAGGTC
Il1rl1	NM_001025602	Il1rl1_F	CTCCAAGAGCCAAGGTTCAG
		Il1rl1_R	CTCCAAGAGCCAAGGTTCAG
IL4i1	NM_010215	IL4i1_F2	TAGCAGCCAAGATGCTCAGT
		IL4i1_R2	CCCTATCCAGCCTGTCTTCT
Gene symbol	NCBI Reference Sequence	Primer Name	Primer Sequence 5'-3'
IL6	NM_031168	IL-6_F	GGACTGATGCTGGTGACAAC
		IL-6_R	CCTCCGACTTGTGAAGTGGT
IRF8	NM_008320	IRF8_F	TGACACCAACCAGTTCATCC
		IRF8_R	GAAACTCCTCCCCGAAGC
Isg15	NM_015783	Isg15_F	CCAGGACGGTCTTACCCTTT
		Isg15_R	CTTTCGTTCCTCACCAGGAT
Kif20a	NM_009004	Kif20a_F	AGCAGATTCGACAGGAGGAA
		Kif20a_R	GGCACCTATCCGACTTTCAG
LTA4H	NM_008517	LTA4H_F	CTCATAGCTGGACAGGAAACC
		LTA4H_R	GAACTTTTCCCCAAACAACC
MAN2B1	NM_010764	MAN2B1_F	ATACCTGTGCTGGGATGTGC
		MAN2B1_R	GTTCGGTAAAACCCTTTCTGG
Nfkb1	NM_008689	mNfkb1_F	GCCTGCAAAGGTTATCGTTC
		mNfkb1_R	TCCTGCTGTTACGGTGCATA
Nfkbia	NM_010907	Nfkbia_F	AGCAGTCTTGACGCAGACCT
		Nfkbia_R	GCCAGGTAGCCGTGAGTAGA
Nfkbib	NM_010908	Nfkbib_F	CCTGAGGACGAGGACGATAA
		Nfkbib_R	CCACTGTGAACCACGATGTC
Nfkbiz	NM_030612	Nfkbiz_F	GTGGAGGCAAAGGATCGTAA
		Nfkbiz_R	TCACGAAAGACAGGCAACTG
Pdzk1ip1	NM_026018	Pdzk1ip1_F	ATTGGAAACAAGGCAGATGG
		Pdzk1ip1_R	TCTCGTAGGCATTCTTGTGCT
Psme2b-PS	NM_011190, NM_001029855	Psme2_F	ACAGACAAGCAGGAGAAGAAGG
		Psme2_R	CTTAACCAAAGCGAGCAAGG
Rab20	NM_011227	Rab20_F	GATGTGCTTCGAGACCAGTG
		Rab20_R	GATCTGACTCCTCAGCCCTCT
SERPINB9	NM_009256	SerpinB9_F	TTAACAGCCTGGATGGAAGC
		SerpinB9_R	AAGTCAGCCTTGTCCTCTTGG
Sgpp1	NM_030750	Sgpp1_F	TGGGCATCTTCTCTTTCACC
		Sgpp1_R	CCAGGGTATAAGCAGCGTGT
Skil	NM_001039090	Skil_F	TGCACCTGTGACTCAACCTT
		Skil_R	TCTTGGAGTTCCTGCCTGTC
Sqstm1	NM_011018	Sqtm1_F	CTGTGGTGGGAACTCGCTAT
		Sqtm1_R	GGGAAAGATGAGCTTGCTGT
Stat5a	NM_011488	Stat5a_F	ACCTGGATGAGAGCATGGAT
		Stat5a_R	GAGCTTCTAGCGGAGGTGAA
TAP1	NM_013683	TAP1_F	ACTGAGGACACAGCCAACG
		TAP1_R	CAGGGTGACCAGAGTGAGG
Tep1	NM_009351	Tep1_F	AAGCACAGAAGTCCCAATGC
		Tep1_R	ACCTGGTCAGTGGTTTCAGG
Tm7sf3	NM_026281	Tm7sf3_F	ACATCCTGGCTTGTGGAGTC
		Tm7sf3_R	GAGGACGTTCAGGGTGATGT
TNFRSF1B	NM_011610	TNFRSF1B_F	CTCTAAGTGCCATCCCAAGG
		TNFRSF1B_R	TTGAACCCAACGATGTAAGG
Traf1	NM_009421	Traf1_F	ACCTGTCCCTCTTCATCGTG
		Traf1_R	ATGCTCTCGGTTGTTCTGGT
TRAFD1	NM_172275	Trafd1_F2	GGTAGAGCAGGGCTTCTGG
		Trafd1_R2	TCAATGAGCAGTTCCTCTGG
TSPAN8	NM_146010	TSPAN8_F2	GTTCAAGTGCTGTGGCTTGG
		TSPAN8_R2	GGAACTCCCCTGATAAGTTGC
USP18	NM_011909	USP18_F	GAACTCTTTGCCGTGATTGC
		USP18_R	AGCAGAACCACTTTCCATCC
Znfr2	AF513708	Znfr2_F2	CGCACTTGTTTGGAGGATT
		Znfr2_R2	CCCCGTATCTTTACTCAGCAC
